# Supplementary material for: Modulating spin dynamics of binuclear LnIII–radical complexes by using different indazole radicals
Source: Royal Society of Chemistry journal article supplement (doi:10.1039/c7ra09192c), 2017-01-01
Supplement: c7ra09192c1.pdf [file c7ra09192c1.pdf]

## Supporting Information

### **Modulating spin dynamics of binuclear Ln<sup>III</sup>-radical complexes by using different indazole radicals**

Peng Yun Chen,<sup>†</sup> Xiu Juan Shi,<sup>†</sup> Ting Li,<sup>†</sup> Li Tian,<sup>\*,†</sup> Zhong Yi Liu,<sup>\*,†</sup> Feng Zhen Hua,<sup>†</sup> Si Jia Yu,<sup>†</sup> and Yuan Yuan Xu<sup>†</sup>

*Tianjin Key Laboratory of Structure and Performance for Functional Molecules, Key Laboratory of Inorganic-Organic Hybrid Functional Materials Chemistry, Ministry of Education, Tianjin Normal University, Tianjin 300387, P. R. China.*

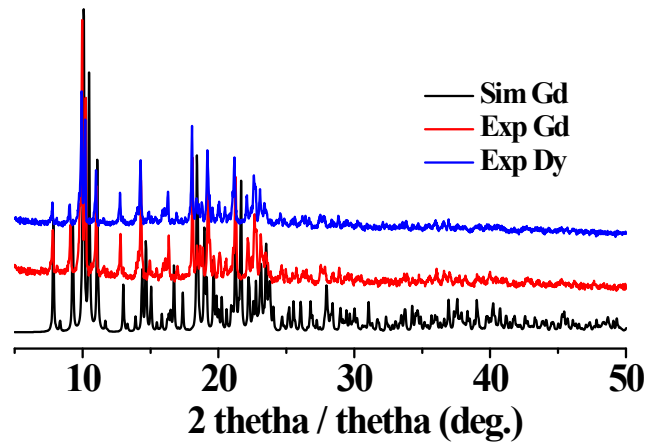

Figure S1. Powder X-ray diffractions of 1–2.

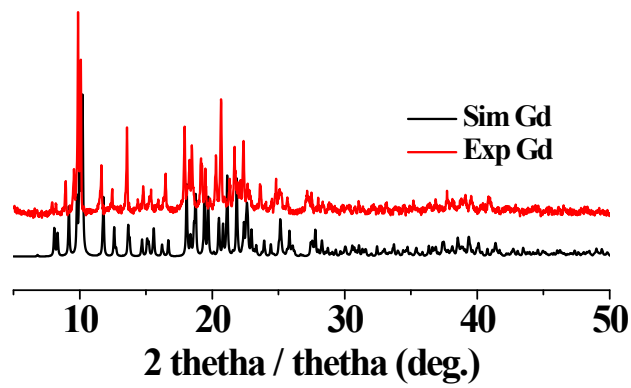

Figure S2. Powder X-ray diffractions of 3.

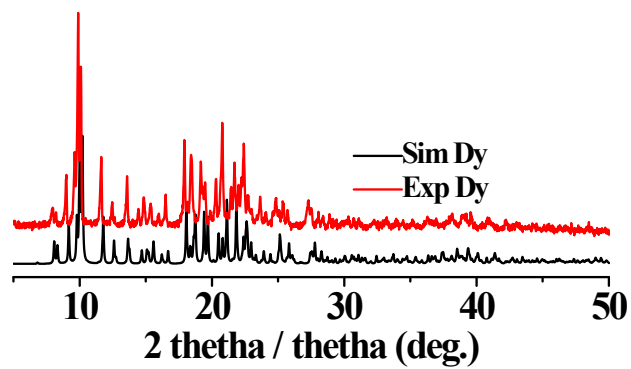

Figure S3. Powder X-ray diffractions of 4.

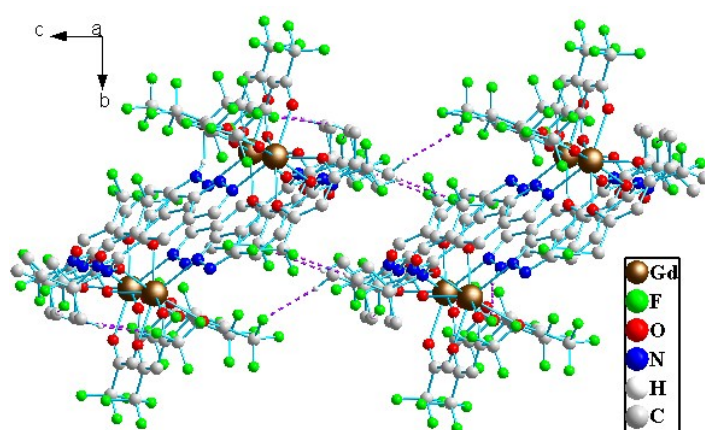

Figure S4. Viewing of the 3D packing structure of 1.

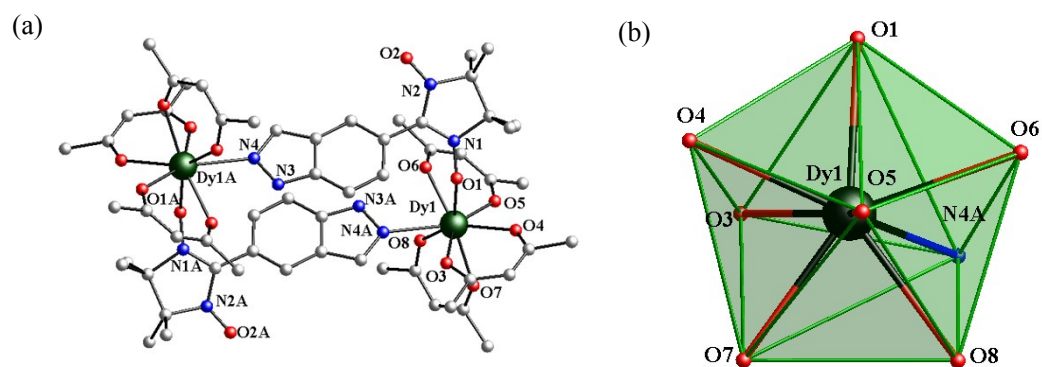

Figure S5. (a) Simplified view of the crystal structure of 2. Fluorine and hydrogen atoms are omitted for clarity. (b)  $D_{2d}$ -symmetry polyhedron of gadolinium atom.

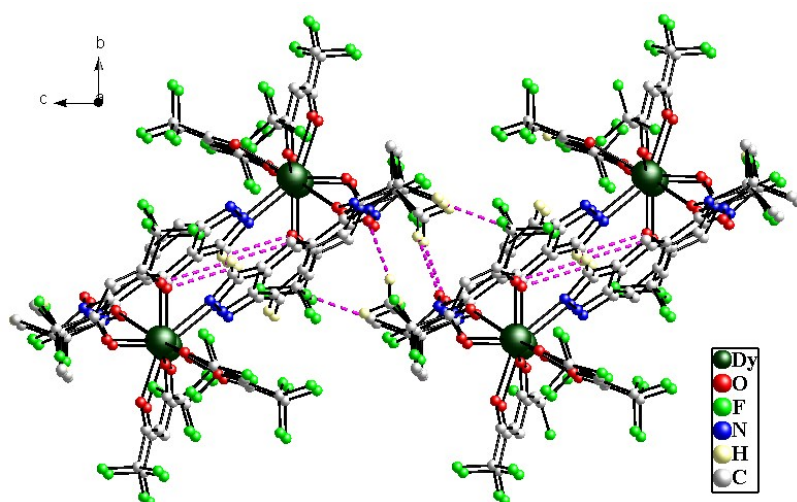

Figure S6. Viewing of the 3D packing structure of **2**.

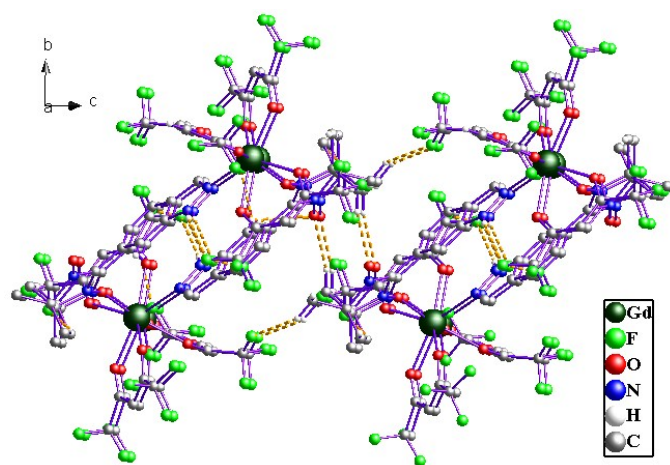

Figure S7. Viewing of the 3D packing structure of **3**.

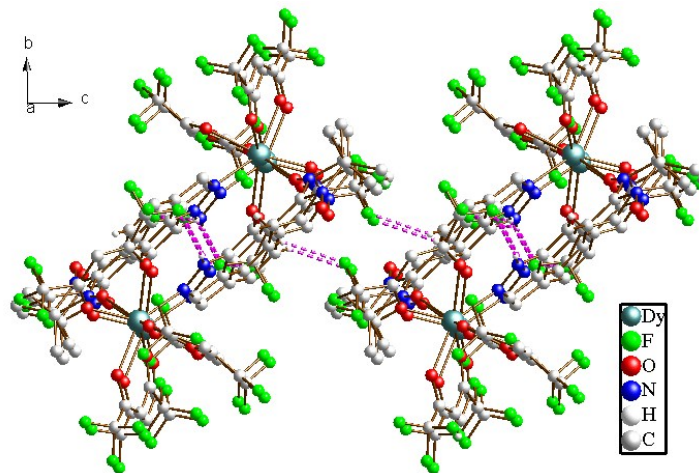

Figure S8. Viewing of the 3D packing structure of **4**.

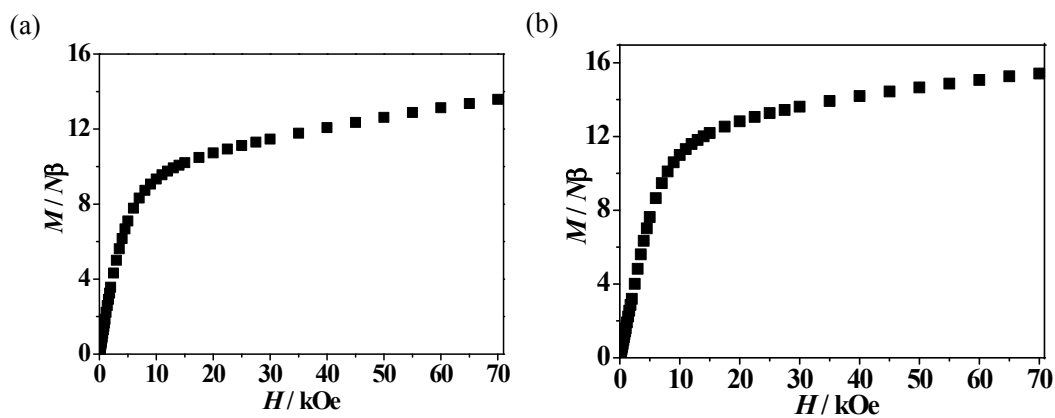

Figure S9. Field dependence of the magnetization at 2 K for complexes **2** (a) and **4** (b).

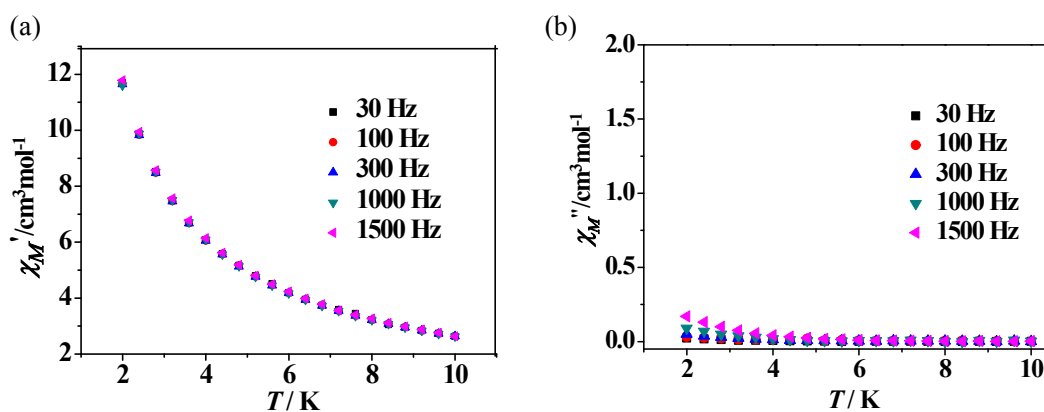

Figure S10. Temperature dependence of the in-phase ( $\chi'$ ) (a) and out-of-phase ( $\chi''$ ) (b) components of the ac magnetic susceptibility for complex **2** under zero dc field

Table S1. Selected bond lengths (Å) and bond angles (°) in complex **1**.

|                   |            |                   |            |
|-------------------|------------|-------------------|------------|
| Gd(1)-O(1)        | 2.332(4)   | O(3)-Gd(1)-N(4)#1 | 75.33(13)  |
| Gd(1)-O(3)        | 2.417(4)   | O(4)-Gd(1)-O(3)   | 71.90(12)  |
| Gd(1)-O(4)        | 2.339(4)   | O(4)-Gd(1)-O(5)   | 78.40(13)  |
| Gd(1)-O(5)        | 2.397(4)   | O(4)-Gd(1)-O(6)   | 86.60(14)  |
| Gd(1)-O(6)        | 2.354(4)   | O(4)-Gd(1)-O(7)   | 76.64(13)  |
| Gd(1)-O(7)        | 2.369(4)   | O(4)-Gd(1)-O(8)   | 147.71(13) |
| Gd(1)-O(8)        | 2.357(4)   | O(4)-Gd(1)-N(4)#1 | 139.64(14) |
| Gd(1)-N(4)        | 2.546(4)   | O(5)-Gd(1)-O(3)   | 71.60(13)  |
| O(1)-Gd(1)-O(3)   | 72.44(13)  | O(6)-Gd(1)-O(3)   | 139.61(14) |
| O(1)-Gd(1)-O(4)   | 102.97(13) | O(6)-Gd(1)-O(5)   | 70.79(13)  |
| O(1)-Gd(1)-O(5)   | 141.50(13) | O(6)-Gd(1)-O(7)   | 77.25(13)  |
| O(1)-Gd(1)-O(6)   | 147.28(13) | O(6)-Gd(1)-O(8)   | 75.32(14)  |
| O(1)-Gd(1)-O(7)   | 74.79(13)  | O(6)-Gd(1)-N(4)#1 | 71.78(14)  |
| O(1)-Gd(1)-O(8)   | 80.67(13)  | N(1)-O(1)-Gd(1)#1 | 139.9(3)   |
| O(1)-Gd(1)-N(4)#1 | 88.71(14)  | N(3)-N(4)-Gd(1)#1 | 117.0(3)   |

Table S2. Selected bond lengths (Å) and bond angles (°) in complex **2**.

|                 |            |                   |            |
|-----------------|------------|-------------------|------------|
| Dy(1)-O(1)      | 2.308(4)   | O(3)-Dy(1)-O(4)   | 74.27(13)  |
| Dy(1)-O(3)      | 2.318(4)   | O(3)-Dy(1)-O(6)   | 137.21(13) |
| Dy(1)-O(4)      | 2.353(4)   | O(3)-Dy(1)-O(7)   | 75.38(14)  |
| Dy(1)-O(5)      | 2.317(4)   | O(3)-Dy(1)-O(8)   | 119.02(14) |
| Dy(1)-O(6)      | 2.386(4)   | O(3)-Dy(1)-N(4)#1 | 71.40(14)  |
| Dy(1)-O(7)      | 2.328(4)   | O(4)-Dy(1)-O(6)   | 126.40(13) |
| Dy(1)-O(8)      | 2.369(4)   | O(4)-Dy(1)-O(8)   | 140.08(14) |
| Dy(1)-N(4)#1    | 2.520(5)   | O(4)-Dy(1)-N(4)#1 | 143.94(14) |
| O(1)-Dy(1)-O(6) | 72.60(13)  | O(5)-Dy(1)-O(4)   | 75.69(14)  |
| O(1)-Dy(1)-O(4) | 74.51(13)  | O(5)-Dy(1)-O(3)   | 147.41(14) |
| O(1)-Dy(1)-O(5) | 103.71(14) | O(5)-Dy(1)-O(6)   | 72.56(13)  |
| O(1)-Dy(1)-O(7) | 146.67(14) | O(5)-Dy(1)-O(7)   | 86.02(14)  |
| O(1)-Dy(1)-O(3) | 80.10(14)  | O(5)-Dy(1)-O(8)   | 78.15(14)  |
| O(1)-Dy(1)-O(8) | 141.64(13) | O(6)-Dy(1)-N(4)#1 | 75.72(14)  |

|                   |           |                 |            |
|-------------------|-----------|-----------------|------------|
| O(1)-Dy(1)-N(4)#1 | 88.95(14) | O(7)-Dy(1)-O(6) | 140.07(14) |
|-------------------|-----------|-----------------|------------|

Table S3. Selected bond lengths (Å) and bond angles (°) in complex **3**.

|                   |            |                   |           |
|-------------------|------------|-------------------|-----------|
| Gd(1)-O(1)        | 2.313(5)   | O(3)-Gd(1)-N(4)#1 | 75.02(18) |
| Gd(1)-O(3)        | 2.389(5)   | O(4)-Gd(1)-O(3)   | 71.9(2)   |
| Gd(1)-O(4)        | 2.330(6)   | O(4)-Gd(1)-O(5)   | 84.6(2)   |
| Gd(1)-O(5)        | 2.343(5)   | O(4)-Gd(1)-O(6)   | 77.9(2)   |
| Gd(1)-O(6)        | 2.398(5)   | O(4)-Gd(1)-O(7)   | 78.9(2)   |
| Gd(1)-O(7)        | 2.371(5)   | O(4)-Gd(1)-O(8)   | 144.6(2)  |
| Gd(1)-O(8)        | 2.393(5)   | O(4)-Gd(1)-N(4)#1 | 142.8(2)  |
| Gd(1)-N(4)#1      | 2.558(6)   | O(5)-Gd(1)-O(3)   | 75.89(19) |
| O(1)-Gd(1)-O(3)   | 77.10(18)  | O(6)-Gd(1)-O(3)   | 136.2(2)  |
| O(1)-Gd(1)-O(4)   | 106.7(2)   | O(6)-Gd(1)-O(5)   | 70.25(19) |
| O(1)-Gd(1)-O(5)   | 145.60(18) | O(6)-Gd(1)-O(7)   | 72.85(19) |
| O(1)-Gd(1)-O(6)   | 143.19(19) | O(6)-Gd(1)-O(8)   | 72.9(2)   |
| O(1)-Gd(1)-O(7)   | 72.41(19)  | O(8)-Gd(1)-N(4)#1 | 70.59(18) |
| O(1)-Gd(1)-O(8)   | 85.97(18)  | N(1)-O(1)-Gd(1)   | 150.6(4)  |
| O(1)-Gd(1)-N(4)#1 | 81.81(18)  | N(3)-N(4)-Gd(1)#1 | 123.2(4)  |

Table S4. Selected bond lengths (Å) and bond angles (°) in complex **4**.

|                 |            |                   |            |
|-----------------|------------|-------------------|------------|
| Dy(1)-O(1)      | 2.284(4)   | O(3)-Dy(1)-O(4)   | 74.55(18)  |
| Dy(1)-O(3)      | 2.346(5)   | O(3)-Dy(1)-O(6)   | 141.97(16) |
| Dy(1)-O(4)      | 2.346(5)   | O(3)-Dy(1)-O(7)   | 77.8(2)    |
| Dy(1)-O(5)      | 2.368(5)   | O(3)-Dy(1)-O(8)   | 127.60(17) |
| Dy(1)-O(6)      | 2.312(5)   | O(3)-Dy(1)-N(4)#1 | 137.99(18) |
| Dy(1)-O(7)      | 2.299(6)   | O(4)-Dy(1)-O(6)   | 104.23(17) |
| Dy(1)-O(8)      | 2.364(5)   | O(4)-Dy(1)-O(8)   | 143.68(16) |
| Dy(1)-N(4)#1    | 2.528(5)   | O(4)-Dy(1)-N(4)#1 | 70.82(16)  |
| O(1)-Dy(1)-O(6) | 145.69(16) | O(5)-Dy(1)-O(4)   | 72.99(19)  |
| O(1)-Dy(1)-O(4) | 85.30(17)  | O(5)-Dy(1)-O(3)   | 72.43(17)  |
| O(1)-Dy(1)-O(5) | 142.28(18) | O(5)-Dy(1)-O(6)   | 71.07(17)  |
| O(1)-Dy(1)-O(7) | 107.38(18) | O(5)-Dy(1)-O(7)   | 77.3(2)    |
| O(1)-Dy(1)-O(3) | 72.23(16)  | O(5)-Dy(1)-O(8)   | 136.66(19) |
| O(1)-Dy(1)-O(8) | 77.28(17)  | O(6)-Dy(1)-N(4)#1 | 70.90(17)  |

---

|                   |           |                 |           |
|-------------------|-----------|-----------------|-----------|
| O(1)-Dy(1)-N(4)#1 | 81.86(16) | O(7)-Dy(1)-O(6) | 84.20(19) |
|-------------------|-----------|-----------------|-----------|

---
